# Supplementary material for: Automated Respiratory Rate Counter to Assess Children for Symptoms of Pneumonia: Protocol for Cross-Sectional Usability and Acceptability Studies in Ethiopia and Nepal
Source: PubMed Central journal article supplement (PMC7154937; doi:10.2196/14405), 2020-03-30

# የራድ ጂ የሰራ መርጃ

Rad-G Device - Job Aid

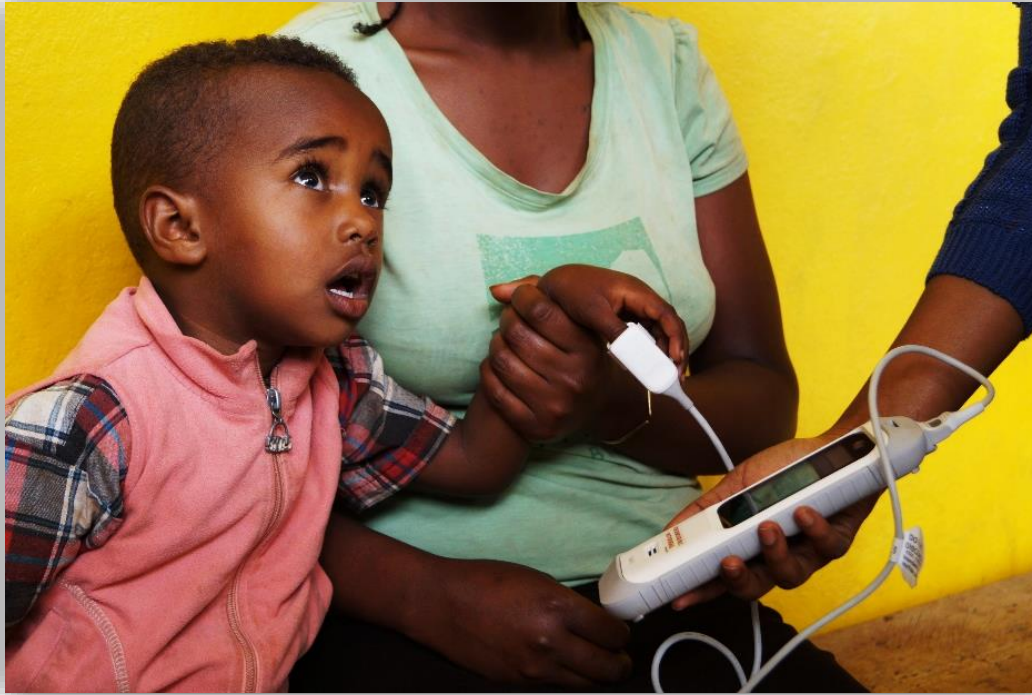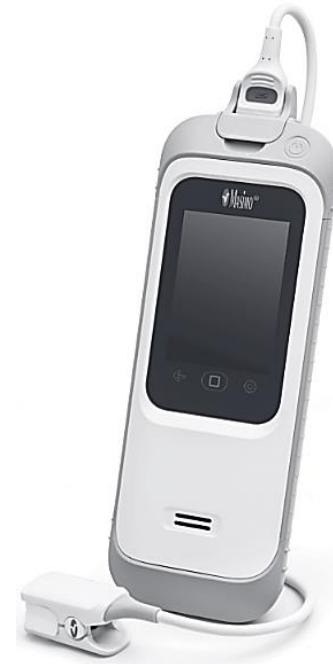

የምርመራ መሳሪያ ኢትዮጵያ

Diagnostic Device Ethiopia

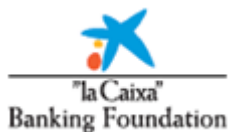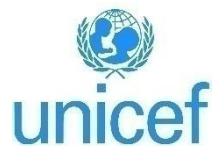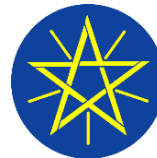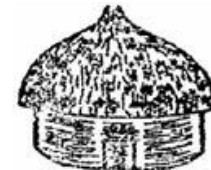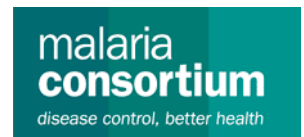

# የህፃናት ዕድሜና ክብደት ማጣራት

## STEP 1: Assess the child's age and weight

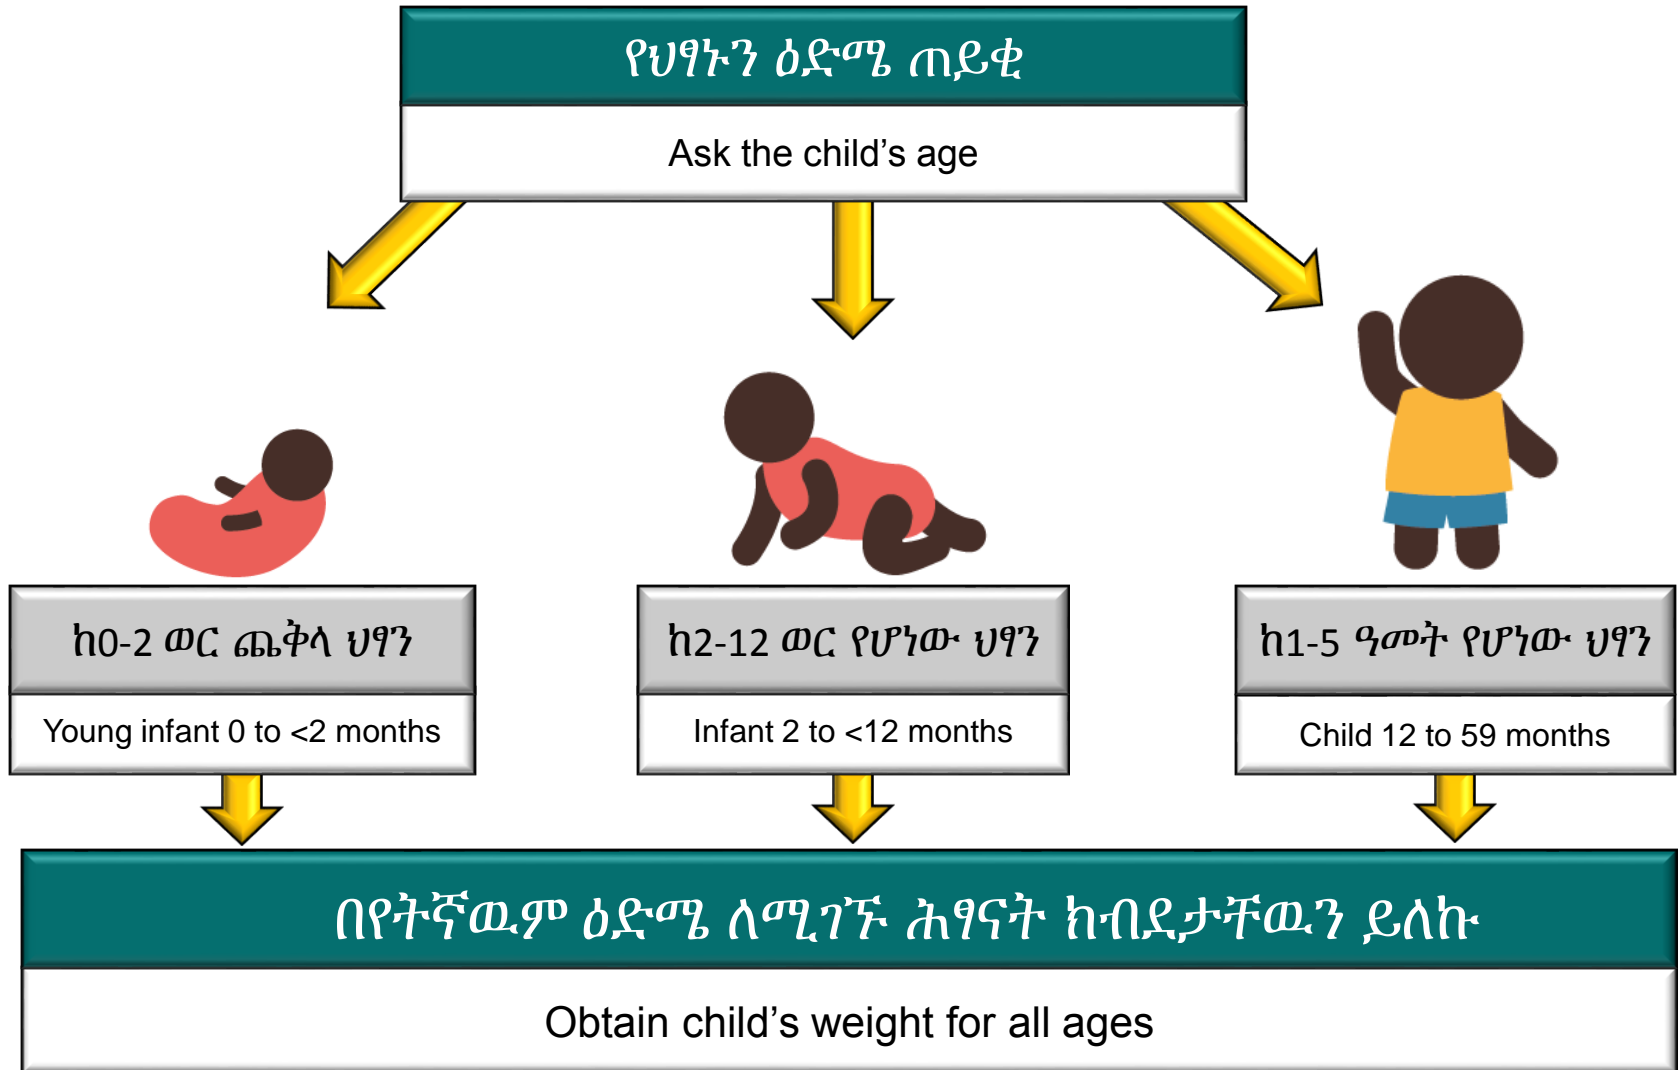

# አደገኛ ምልክቶችን መመርመር 0-2 ወራት

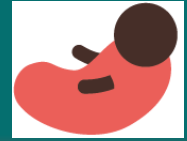

## STEP 2: Assess for signs of Very Severe Disease: 0 to < 2 months

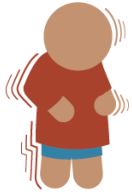

ጨቅላዉ ኮንቨልሽን ካለዉ

The infant has convulsions now

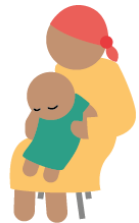

ጨቅላዉ ሲነኩት ብቻ የሚንቀሳቀስ ወይም ሲነካም የማይንቀሳቀስ

The infant is moving only when stimulated or not at all moving

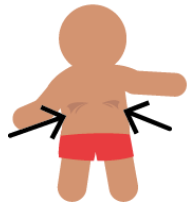

ጨቅላዉ ከባድ የደረት መሰርጎድ አለዉ

The infant has chest indrawing

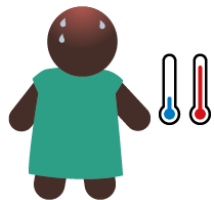

ጨቅላዉ የሰውነት ሙቀት መጠን ይለኩ።  
የሙቀት መጠኑ  $\geq 37.5$  ከሆነ ትኩሳት ነው።  
የሙቀት መጠኑ  $< 35.5$  c ከሆነ ዝቅተኛ የሙቀት መጠን ነው።

Obtain axillary temperature.  
The infant has fever  $\geq 37.5$  c  
or low body temperature  $< 35.5$  c

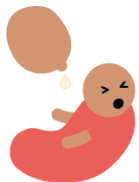

ጨቅላዉ በደንብ መጥባት አቅቶታል

The infant has stopped feeding well

በጥናቱ አይካተትም ለታካሚዉ ጨቅላ የቅድመ ሪፈራል መድሃኒት በመስጠት በአፋጣኝ ወደ ሆስፒታል ሪፈር አድርጊ

Exclude. Give infant pre-referral dose and refer immediately to hospital

ወደ ተግባር 3 ይቀጥሉ፡

Proceed to Step 3: Assess RR and SpO2 with Rad-G

# አደገኛ ምልክቶችን መመርመር 2-59 ወራት

## STEP 2: Assess for Danger Signs: 2 to 59 months

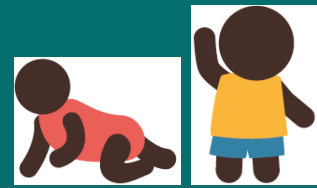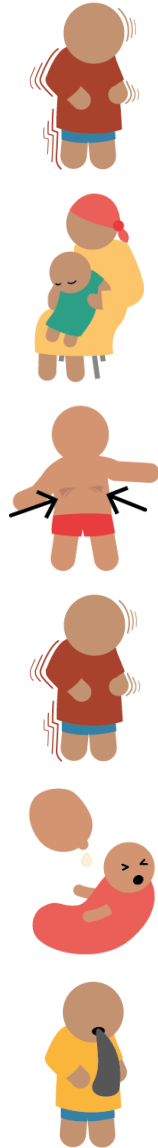

|                                                     |
|-----------------------------------------------------|
| <b>ህፃኑ አሁን ኮንቨልሽን አለው?</b>                          |
| The child is convulsing now                         |
| <b>ህፃኑ የፈዘዘ ወይም ራሱን የሳተ ነው?</b>                     |
| The child is lethargic or unconscious               |
| <b>የደረት መሰርጎድ / ሰትራይደር አለው</b>                      |
| The child has chest indrawing or stridor            |
| <b>ህፃኑ በዝህኛው ህመሙ ጊዜ ኮንቨልሽን ነበረው?</b>                |
| The child has had convulsions                       |
| <b>ህፃኑ መጠጣት / ጡት መጥባት አቅቶታል?</b>                    |
| The child is unable to drink or breastfeed          |
| <b>ህፃኑ የበላውን እና የጠጣውን በሙሉ እና በወሰደ ቁጥር ያስመልሰዋል ?</b> |
| The child vomits everything                         |

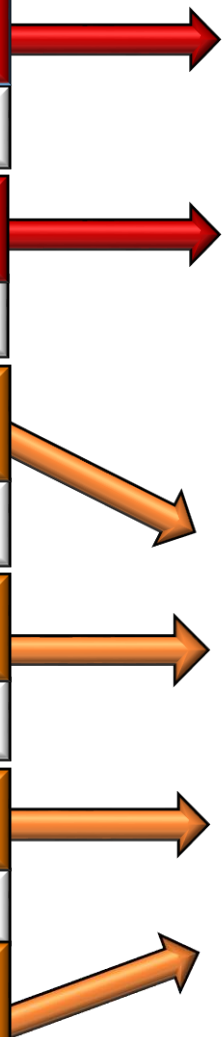

**በጥናቱ አይካተትም ለታካሚው ሕፃን የቅድመ ሪፈራል መድሃኒት በመስጠት በአፋጣኝ ወደ ሆስፒታል ሪፈር አድርጌ**

**Exclude. Give pre-referral dose and refer immediately to hospital.**

**ወደ ተግባር 3 ይቀጥሉ:**

**Proceed to Step 3: Assess RR and SpO2 with Rad-G**

# የህፃኑን የሕህመም ሁኔታ መመርመር

## STEP 3: Assess the child's history of illness

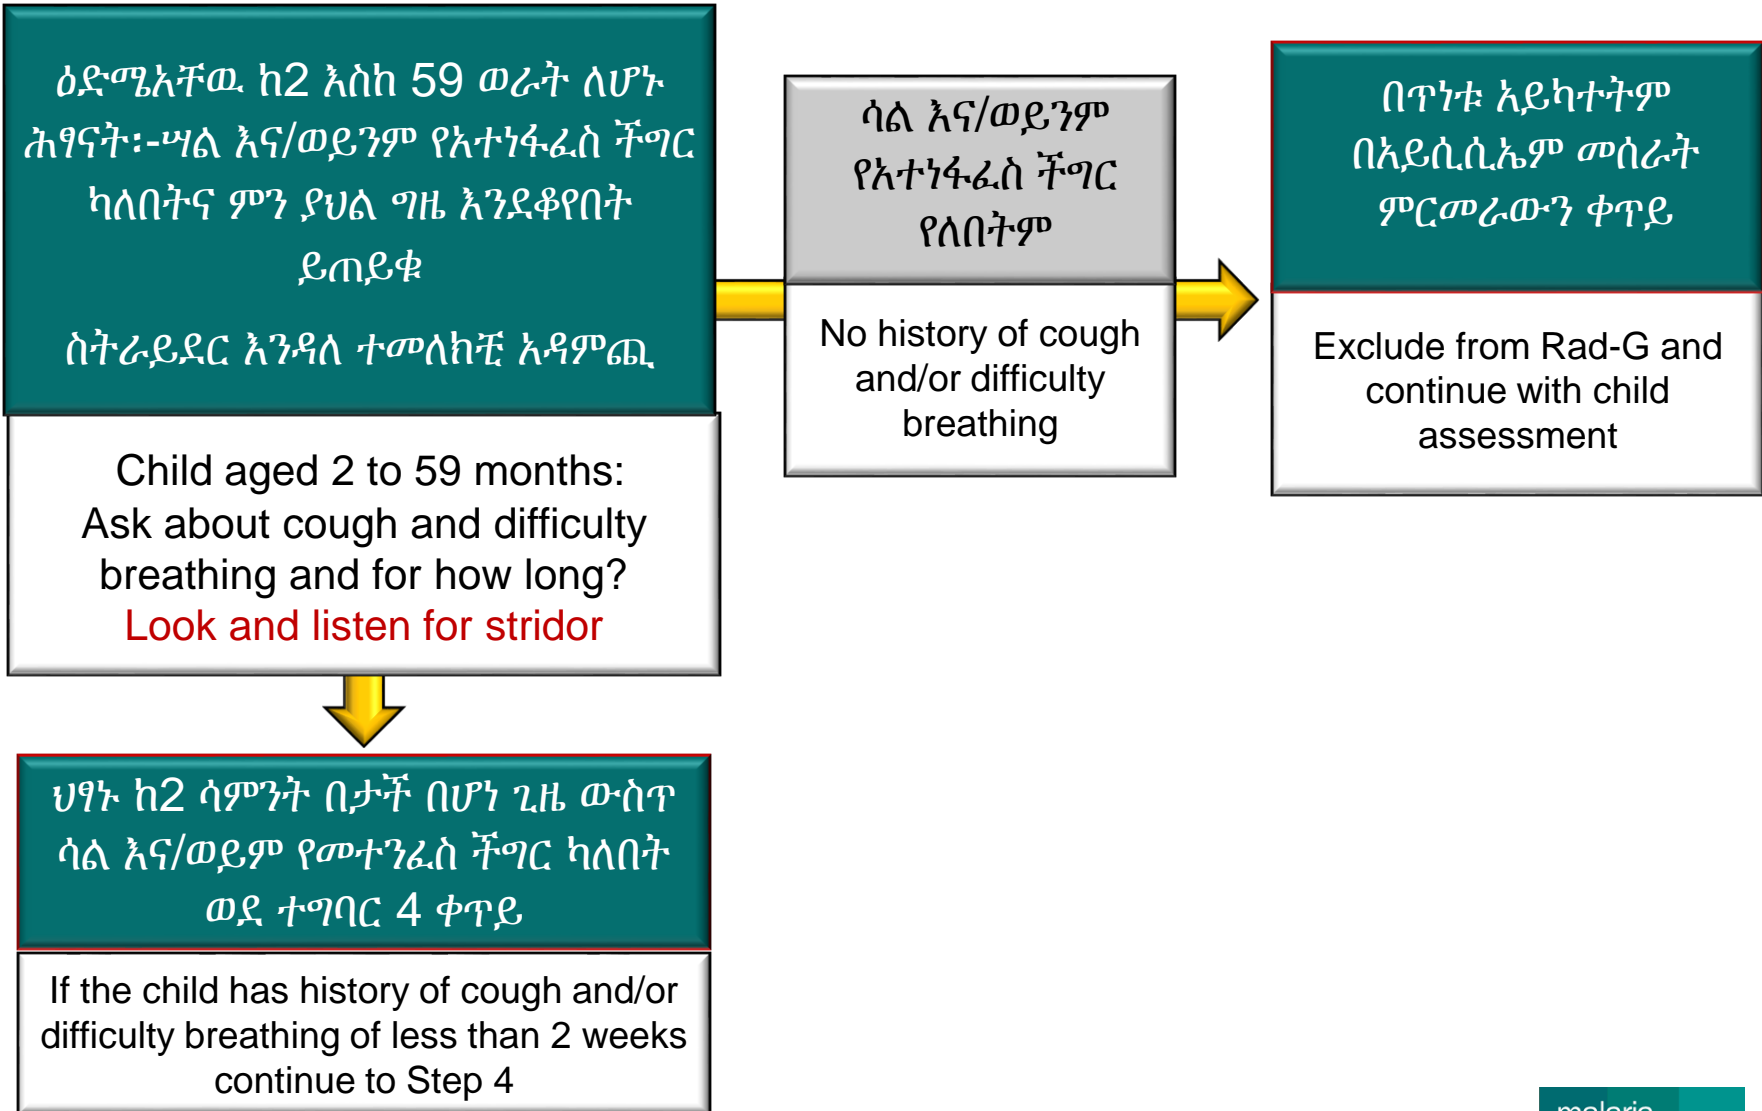

# በራድ ጂ መሳሪያ አከሰጂን መጠንና ትንፋሽ መጠንን መለካት

## STEP 4: Assess RR and SpO2 using the Rad-G Device

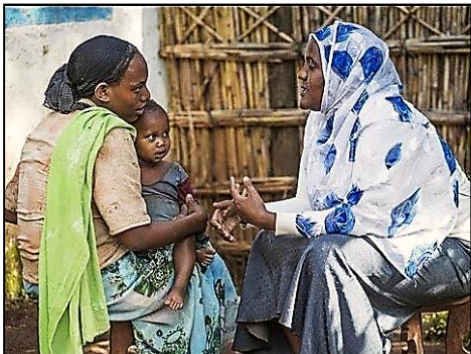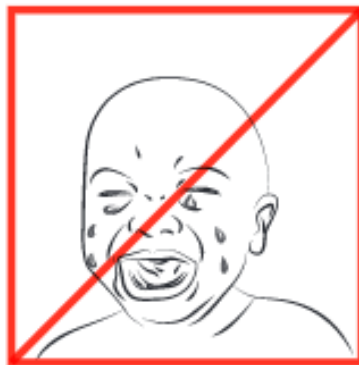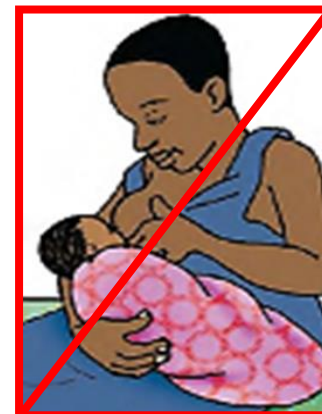

ለሕፃኑ ወላጅ/አሳዳጊ የራድ-ጂ መሳሪያን በመጠቀም ምርመራ እንደምታካሂዱ በሚገባ አብራራላቸው።

Explain to the caregiver that you will use the Rad-G device

ህፃኑ እስኪረጋጋ ጠብቁ

Wait for the child to be calm

ህፃኑ ጡት መጥባት የለበትም

The child should not be feeding

# በራድ ጂ መሳሪያ አክሲዲን መጠንና ትንፋሽ መጠንን መለካት

## STEP 4: Assess RR and SpO2 using the Rad-G Device

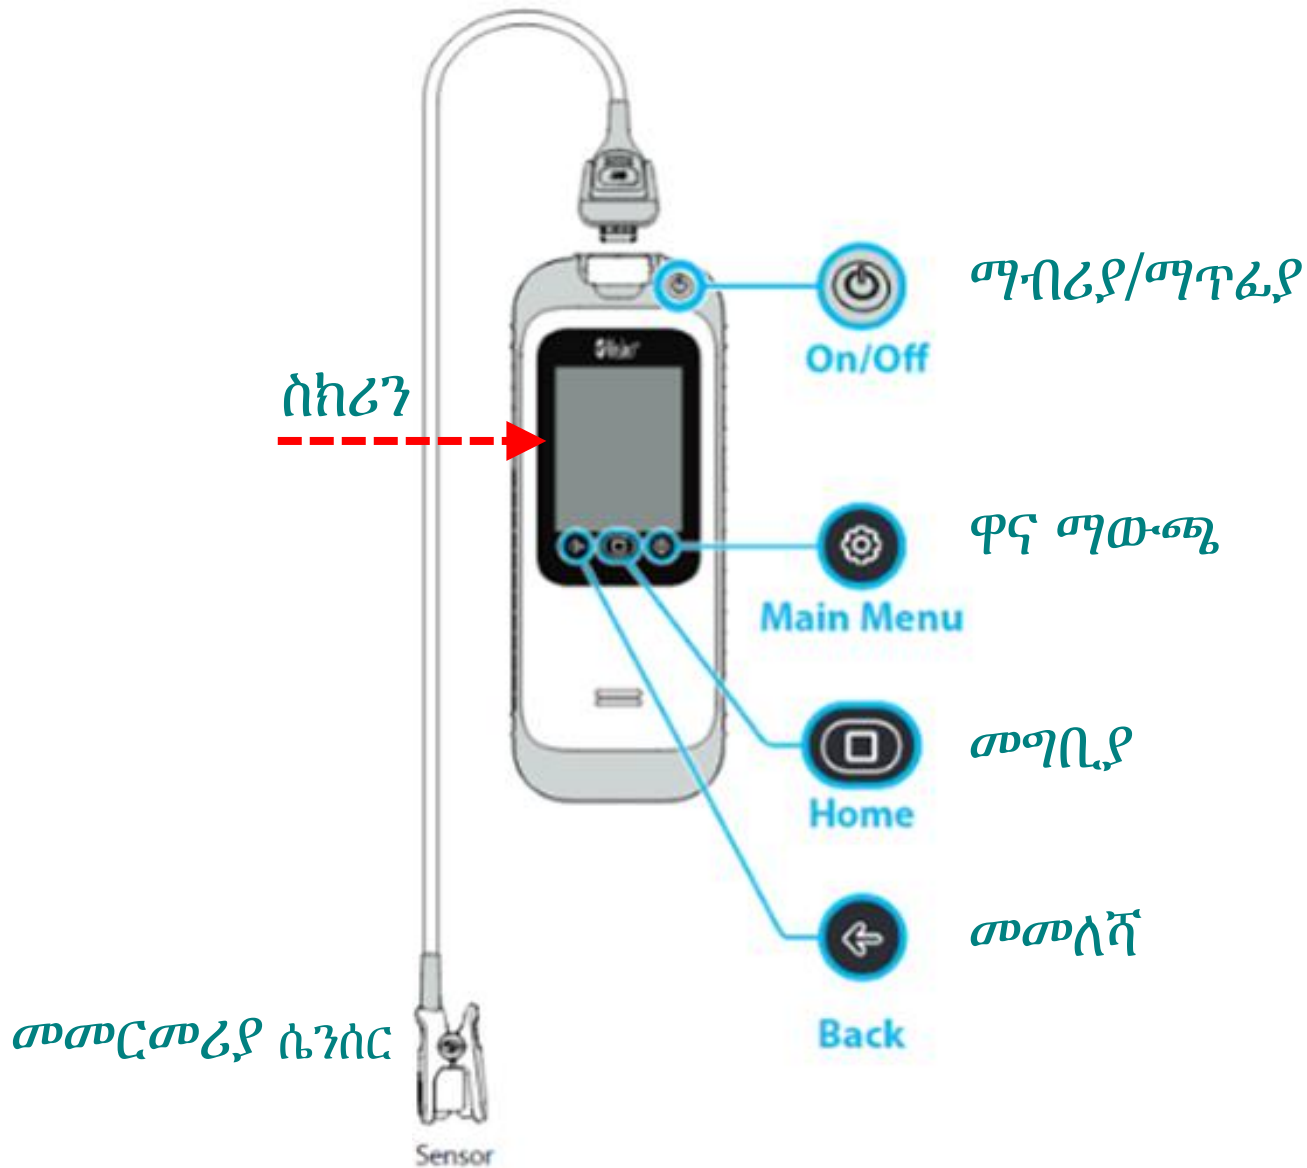

# በራድ ጂ መሳሪያ አከሰጂን መጠንና ትንፋሽ መጠንን መለካት

## STEP 4: Assess RR and SpO2 using the Rad-G Device

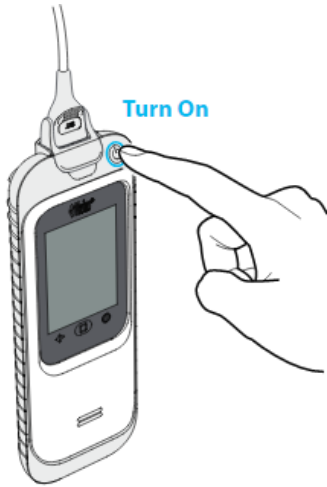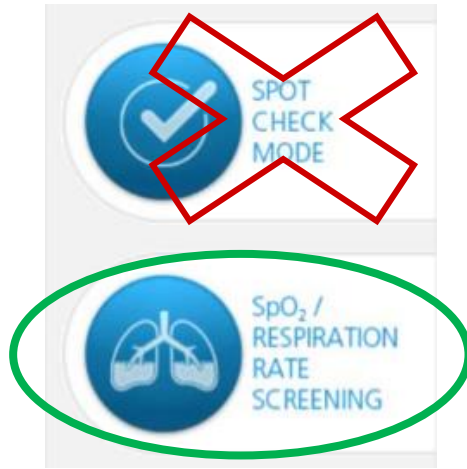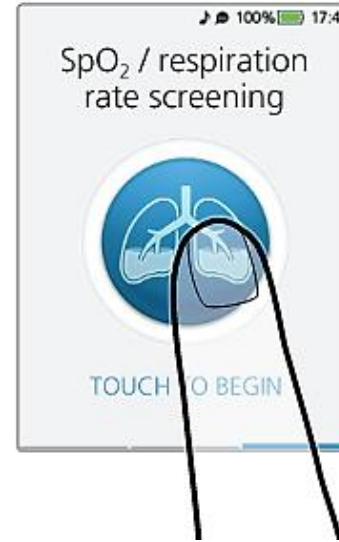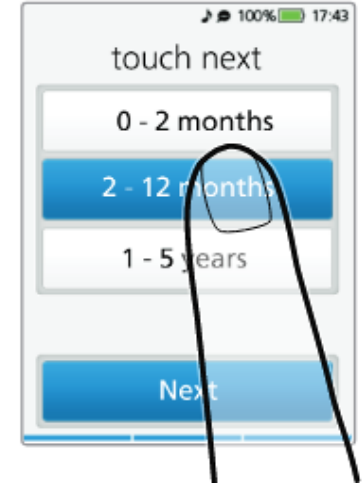

ማብሪያ  
ማጥፊያውን  
በመጫን  
መሳሪያውን አብሪ

Turn on the device

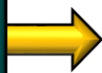

የሳንባ ምስል  
ያለበትን የምርመራ  
አማራጭን ምረጧ

Select the screening  
mode

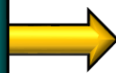

እስከሪት ላይ የሳንባ  
ምስል ያለበትን  
በመጫን አሰጅምሪ

Touch the lung icon on  
the screen to begin

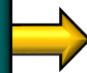

የህፃናት ዕድሜ  
ከመረጥሽ በኋላ  
Next የሚለውን ንኪ

Select age group  
and press 'Next'



# በራድ ጂ መሳሪያ አከሰጂን መጠንና ትንፋሽ መጠንን መለካት

## STEP 4: Assess RR and SpO2 using the Rad-G Device

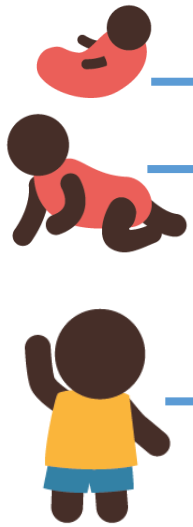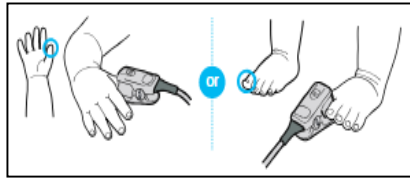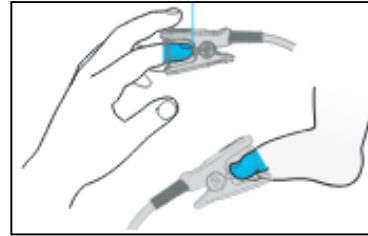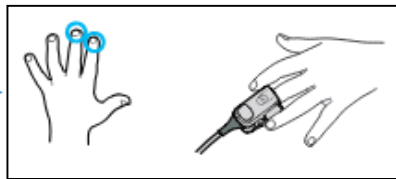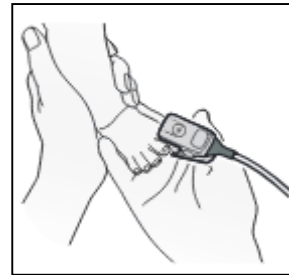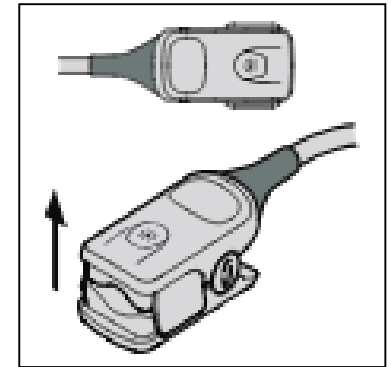

ሴንሰሩ ንፁህ መሆኑን አረጋግጪ የህፃኑን የእጅ ጣት ወይም የእግር አውራ ጣት በማፅዳት ከመመርመሪያው ሴንሰር ጋር አያይዢ

Check the sensor to make sure it is clean. Select the child's toe, finger or thumb for best fit and clean with alcohol swab before applying probe

የህፃኑን ጣት በመመርመሪያው ሴንሰር ላይ ሙሉ በሙሉ እንዲገባ በማድረግ ህፃኑ እንዳይንቀሳቀስ አድርጊ

Fully insert the probe and ensure there is no movement

የጣት ምልክት ያለበት የመመርመሪያው ሴንሰር ገፅ ከላይ በኩል መሆን ይኖርበታል

The probe needs to have the picture facing up

# በራድ ጂ መሳሪያ አከሰጂን መጠንና ትንፋሽ መጠንን መለካት

## STEP 4: Assess RR and SpO2 using the Rad-G Device

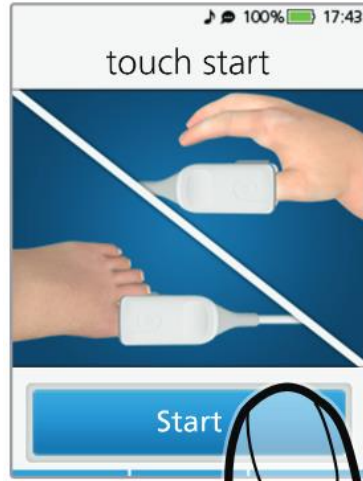

Start የሚለውን በመንካት አሰጅምሪ

Press 'Start'

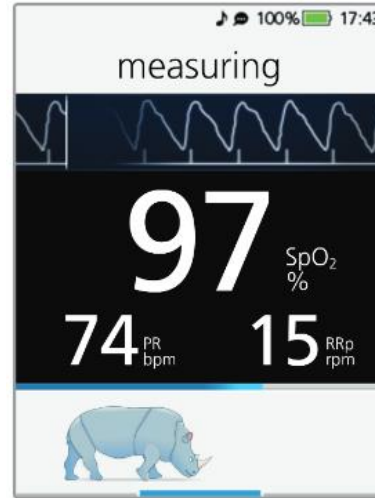

ውጤት እስከሚታይ ጠብቁ

Wait for the results

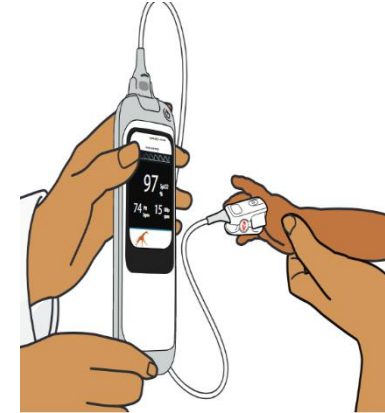

ውጤት እስከሚታይ ስክሪኑን በማሳየት ህፃኑን ማጫወት ትጅያለሽ

Show the screen to the child for entertainment

በራድ ጂ መሳሪያ ውጤት ለማግኘት እስከ 3 ሙከራ መደረግ ይኖርበታል። ከ3 ሙከራ በኋላ በተለመደው የትንፋሽ መቁጠሪያ መጠቀም ይቻላል።

If you are unsuccessful with Rad-G, try up to 3 times before using your normal practice

# የራድ ጂ ውጤትን መተንተን

## STEP 5: Interpret the Rad-G results

| የስክሪን ቀለም<br>Screen Colour | የአክሲጂን መጠን<br>SpO2 Results | ትንፋሽ በደቂቃ<br>RR results                                                                                                                                                                                                               | ውጤቱ ምን ማለት ነው<br>Interpretation |
|----------------------------|----------------------------|---------------------------------------------------------------------------------------------------------------------------------------------------------------------------------------------------------------------------------------|---------------------------------|
| አረንጓዴ<br>Green             | ≥90%                       | ከ 0 እስከ 2 ወራት 59 ትንፋሽ በደቂቃ ወይንም በታች<br>ከ 2 እስከ 12 ወራት 49 ትንፋሽ በደቂቃ ወይንም በታች<br>ከ 12 እስከ 59 ወራት 39 ትንፋሽ በደቂቃ ወይንም በታች<br>0 to <2 months 59 breaths or less<br>2 to <12 months 49 breaths or less<br>12 to 59 months 39 breaths or less | ኔጌቲቭ<br>Negative                |
| ቀይ<br>Red                  | <90%                       | ከ 0 እስከ 2 ወራት 60 ትንፋሽ በደቂቃ ወይንም በላይ<br>ከ 2 እስከ 12 ወራት 50 ትንፋሽ በደቂቃ ወይንም በላይ<br>ከ 12 እስከ 59 ወራት 40 ትንፋሽ በደቂቃ ወይንም በላይ<br>0 to <2 months 60 breaths or more<br>2 to <12 months 50 breaths or more<br>12 to 59 months 40 breaths or more | ፖዘቲቭ<br>Positive                |
| ቀይ<br>Red                  | ≥90%                       | ከ 0 እስከ 2 ወራት 60 ትንፋሽ በደቂቃ ወይንም በላይ<br>ከ 2 እስከ 12 ወራት 50 ትንፋሽ በደቂቃ ወይንም በላይ<br>ከ 12 እስከ 59 ወራት 40 ትንፋሽ በደቂቃ ወይንም በላይ<br>0 to <2 months 60 breaths or more<br>2 to <12 months 50 breaths or more<br>12 to 59 months 40 breaths or more | ፖዘቲቭ<br>Positive                |
| ቀይ<br>Red                  | <90%                       | ከ 0 እስከ 2 ወራት 59 ትንፋሽ በደቂቃ ወይንም በታች<br>ከ 2 እስከ 12 ወራት 49 ትንፋሽ በደቂቃ ወይንም በታች<br>ከ 12 እስከ 59 ወራት 39 ትንፋሽ በደቂቃ ወይንም በታች<br>0 to 2 months 59 breaths or less<br>2 to <12 months 49 breaths or less<br>12 to 59 months 39 breaths or less  | ፖዘቲቭ<br>Positive                |

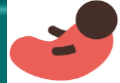

# STEP 6: Classify infant 0 to <2 months based on SpO2, RR results, and signs of very severe disease

| የከባድ በሽታ ምልክቶች<br>Signs of very severe disease 0 to <2 months                                                                                                                                                                                                                                                                                                           | የትንፋሽ መጠን<br>RR                                                                                                                                                                                                               | የአክሲጅን መጠን<br>SpO2                                                                   | ስያሜ<br>Classification                                                                                                       | ህክምና<br>Treatment                                                                               |
|-------------------------------------------------------------------------------------------------------------------------------------------------------------------------------------------------------------------------------------------------------------------------------------------------------------------------------------------------------------------------|-------------------------------------------------------------------------------------------------------------------------------------------------------------------------------------------------------------------------------|--------------------------------------------------------------------------------------|-----------------------------------------------------------------------------------------------------------------------------|-------------------------------------------------------------------------------------------------|
| <ul style="list-style-type: none"> <li>ጡት በደንብ መጥባት ያቃተው ወይም</li> <li>ትኩሳት <math>\geq 37.5</math> ዲ.ሴ ካለው ወይም የሚቀዘቅዝ <math>&lt; 35</math> ዲ.ሴ ከሆነ ወይም</li> <li>ከባድ የደረት መስርጎድ ያለው</li> <li>Chest indrawing, OR</li> <li>Fever (<math>\geq 37.5</math> C or feels hot), OR</li> <li>Low body temperature (35.5 C or feels cold), OR</li> <li>Not feeding well</li> </ul> | <p>ፈጣን አተነፋፈስ (<math>\geq 60</math> ትንፋሽ በደቂቃ) ወይም</p> <p>ፈጣን ያልሆነ አተነፋፈስ (<math>\leq 59</math> ትንፋሽ በደቂቃ)</p> <p>Fast breathing (<math>\geq 60</math> breaths) OR</p> <p>Normal breathing (<math>\leq 59</math> breaths)</p> | <p>የአክሲጅን መጠን ዝቅተኛ አይደለም (<math>&gt;90\%</math>)</p> <p>SP <math>&gt;90\%</math></p> | <p>በጣም ከባድ በሽታ</p> <p>VERY SEVERE DISEASE</p>                                                                               | <p>የቅድመ ሪፈራል መድሀኒት መስጠትና በአፋጣኝ አክሲጅን ወዳለበት ሆስፒታል ሪፈር ማድረግ</p>                                   |
|                                                                                                                                                                                                                                                                                                                                                                         |                                                                                                                                                                                                                               | <p>ዝቅተኛ የአክሲጅን መጠን (<math>\leq 90\%</math>)</p> <p>SP <math>\leq 90\%</math></p>     | <p>በጣም ከባድ በሽታ እና ዝቅተኛ የአክሲጅን መጠን</p> <p>VERY SEVERE DISEASE with HYPOXIA</p>                                               |                                                                                                 |
| <p>የከባድ በሽታ ምልክቶች የሌለው</p> <p>No other signs of very severe disease</p>                                                                                                                                                                                                                                                                                                 | <p>ፈጣን አተነፋፈስ (<math>\geq 60</math> ትንፋሽ በደቂቃ)</p> <p>Fast breathing (<math>\geq 60</math> breaths)</p>                                                                                                                       | <p>የአክሲጅን መጠን ዝቅተኛ አይደለም (<math>&gt;90\%</math>)</p> <p>SP <math>&gt;90\%</math></p> | <p>በጣም ከባድ በሽታ</p> <p>VERY SEVERE DISEASE</p>                                                                               | <p>Give pre-referral dose if appropriate and REFER URGENTLY to hospital with oxygen therapy</p> |
|                                                                                                                                                                                                                                                                                                                                                                         |                                                                                                                                                                                                                               | <p>ዝቅተኛ የአክሲጅን መጠን (<math>\leq 90\%</math>)</p> <p>SP <math>\leq 90\%</math></p>     | <p>በጣም ከባድ በሽታ እና ዝቅተኛ የአክሲጅን መጠን</p> <p>VERY SEVERE DISEASE with HYPOXIA</p>                                               |                                                                                                 |
| <p>የከባድ በሽታ ምልክቶች የሌለው</p> <p>No signs of very severe disease</p>                                                                                                                                                                                                                                                                                                       | <p>ፈጣን ያልሆነ አተነፋፈስ (<math>\geq 59</math> ትንፋሽ በደቂቃ)</p> <p>Normal breathing (<math>\leq 59</math> breaths)</p>                                                                                                                | <p>ዝቅተኛ የአክሲጅን መጠን</p> <p>SP <math>\leq 90\%</math></p>                              | <p>ዝቅተኛ የአክሲጅን መጠን (የከባድ በሽታ ምልክቶች እና ፈጣን አተነፋፈስ የሌለው)</p> <p>HYPOXIA with no signs of severe disease or fast breathing</p> | <p>በአፋጣኝ አክሲጅን ወዳለበት ሆስፒታል ሪፈር ማድረግ</p> <p>Refer to hospital for oxygen therapy</p>             |
| <p>የከባድ በሽታ ምልክቶች የሌለው</p> <p>No signs of very severe disease</p>                                                                                                                                                                                                                                                                                                       | <p>ፈጣን ያልሆነ አተነፋፈስ (<math>\geq 59</math> ትንፋሽ በደቂቃ)</p> <p>Normal breathing (<math>\leq 59</math> breaths)</p>                                                                                                                | <p>የአክሲጅን መጠን ዝቅተኛ አይደለም (<math>&gt;90\%</math>)</p> <p>SP <math>&gt;90\%</math></p> | <p>ከባድ በሽታ የሌለው</p> <p>SEVERE DISEASE UNLIKELY</p>                                                                          | <p>የቤት ውስጥ ክብካቤ እንድታደርግ ለእናትየው ምክር ስጪ</p> <p>Advise mother to give homecare</p>                 |

2 to 12 ወራት በከባድ ህመም ምልክቶች፣ በአክሲዥን እና አተነፋፈስ መጠን መሰረት መሰየም

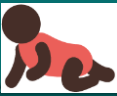

**STEP 6:** Classify child 2-12 months based on SpO2, RR results, and danger signs

| የከባድ በሽታ ምልክቶች<br>Signs of illness 2 to 12 months                                                                                                                                                                                                                                                                                            | የትንፋሽ መጠን<br>RR                                                                                                                                                                                                              | የአክሲዥን መጠን<br>SpO2                                                                   | ስያሜ<br>Classification                                                                                                    | ህክምና<br>Treatment                                                                                                                                                    |
|----------------------------------------------------------------------------------------------------------------------------------------------------------------------------------------------------------------------------------------------------------------------------------------------------------------------------------------------|------------------------------------------------------------------------------------------------------------------------------------------------------------------------------------------------------------------------------|--------------------------------------------------------------------------------------|--------------------------------------------------------------------------------------------------------------------------|----------------------------------------------------------------------------------------------------------------------------------------------------------------------|
| <ul style="list-style-type: none"> <li>• ሳል ወይም የመተንፈስ ችግር ያለው እና</li> <li>• በተረጋጋ ዕፃን ስትራይደር ያለው ወይም</li> <li>• የአደገኛ በሽታ ምልክቶች ያለው ወይም</li> <li>• የደረት መሰርጎድ ያለው</li> <li>• History of cough or difficulty breathing, AND</li> <li>• Stridor in calm child, OR</li> <li>• Any general danger sign OR</li> <li>• chest indrawing</li> </ul> | <p>ፈጣን አተነፋፈስ (<math>\geq 50</math> ትንፋሽ በደቂቃ) ወይም</p> <p>ፈጣን ያልሆነ አተነፋፈስ (<math>&lt;49</math> ትንፋሽ በደቂቃ)</p> <p>Fast breathing (<math>\geq 50</math> breaths) OR</p> <p>Normal breathing (<math>\leq 49</math> breaths)</p> | <p>የአክሲዥን መጠን ዝቅተኛ አይደለም (<math>&gt;90\%</math>)</p> <p>SP <math>&gt;90\%</math></p> | <p>ከባድ የሳንባ ምች ወይም በጣም ከባድ በሽታ</p> <p>SEVERE PNEUMONIA or VERY SEVERE DISEASE</p>                                        | <p>የቅድመ ሪፈራል መድሀኒት መስጠትና በአፋጣኝ አክሲዥን ወዳለበት ሆስፒታል ሪፈራ ማድረግ</p> <p>Give first dose of an appropriate antibiotic and REFER URGENTLY to hospital with oxygen therapy</p> |
| <ul style="list-style-type: none"> <li>• ሳል ወይም የመተንፈስ ችግር ያለው እና</li> <li>• ስትራይደር ያለው ወይም</li> <li>• የአደገኛ በሽታ ምልክቶች የሌለው ወይም</li> <li>• የደረት መሰርጎድ የሌለው</li> </ul> <p>History of cough or difficulty breathing AND NO general danger signs, NO chest indrawing, NO stridor</p>                                                            | <p>ፈጣን አተነፋፈስ (<math>\geq 50</math> ትንፋሽ በደቂቃ)</p> <p>Fast breathing (<math>\geq 50</math> breaths)</p>                                                                                                                      | <p>ዝቅተኛ የአክሲዥን መጠን (<math>\leq 90\%</math>)</p> <p>SP <math>\leq 90\%</math></p>     | <p>የሳንባ ምች እና ዝቅተኛ የአክሲዥን መጠን</p> <p>PNEUMONIA with HYPOXIA</p>                                                          |                                                                                                                                                                      |
| <ul style="list-style-type: none"> <li>• ሳል ወይም የመተንፈስ ችግር ያለው እና</li> <li>• ስትራይደር ያለው ወይም</li> <li>• የአደገኛ በሽታ ምልክቶች የሌለው ወይም</li> <li>• የደረት መሰርጎድ የሌለው</li> </ul> <p>History of cough or difficulty breathing AND NO general danger signs, NO chest indrawing, NO stridor</p>                                                            | <p>ፈጣን ያልሆነ አተነፋፈስ (<math>\leq 49</math> ትንፋሽ በደቂቃ)</p> <p>Normal breathing (<math>\leq 49</math> breaths)</p>                                                                                                               | <p>ዝቅተኛ የአክሲዥን መጠን (<math>\leq 90\%</math>)</p> <p>SP <math>\leq 90\%</math></p>     | <p>ዝቅተኛ የአክሲዥን መጠን (የሳንባ ምች ወይም በጣም ከባድ በሽታ የሌለው)</p> <p>HYPOXIA</p> <p>No signs of severe disease or fast breathing</p> | <p>በአፋጣኝ አክሲዥን ወዳለበት ሆስፒታል ሪፈራ ማድረግ</p> <p>REFER URGENTLY to hospital with oxygen therapy</p>                                                                        |
| <ul style="list-style-type: none"> <li>• ሳል ወይም የመተንፈስ ችግር ያለው እና</li> <li>• ስትራይደር ያለው ወይም</li> <li>• የአደገኛ በሽታ ምልክቶች የሌለው ወይም</li> <li>• የደረት መሰርጎድ የሌለው</li> </ul> <p>History of cough or difficulty breathing AND NO general danger signs, NO chest indrawing, NO stridor</p>                                                            | <p>ፈጣን አተነፋፈስ (<math>\geq 50</math> ትንፋሽ በደቂቃ)</p> <p>Fast breathing (<math>\geq 50</math> breaths)</p>                                                                                                                      | <p>የአክሲዥን መጠን ዝቅተኛ አይደለም (<math>&gt;90\%</math>)</p> <p>SP <math>&gt;90\%</math></p> | <p>የሳንባ ምች</p> <p>PNEUMONIA</p>                                                                                          | <p>በአጥባቢው ዲቲ በ ቀን 2 ጊዜ ለ5 ቀን ህክምና ስጧል</p> <p>Treat with oral amoxicillin 2 times a day for 5 days</p>                                                                |
| <ul style="list-style-type: none"> <li>• ሳል ወይም የመተንፈስ ችግር ያለው እና</li> <li>• ስትራይደር ያለው ወይም</li> <li>• የአደገኛ በሽታ ምልክቶች የሌለው ወይም</li> <li>• የደረት መሰርጎድ የሌለው</li> </ul> <p>History of cough, NO general danger signs, NO chest indrawing, NO stridor</p>                                                                                       | <p>ፈጣን ያልሆነ አተነፋፈስ (<math>\leq 49</math> ትንፋሽ በደቂቃ)</p> <p>Normal breathing (<math>\leq 49</math> breaths)</p>                                                                                                               | <p>የአክሲዥን መጠን ዝቅተኛ አይደለም (<math>&gt;90\%</math>)</p> <p>SP <math>&gt;90\%</math></p> | <p>ሳል ወይም ጉንፋን</p> <p>COUGH or COLD</p>                                                                                  | <p>የቤት ውስጥ ከብክብ እንድታደርግ ለእናትዎ ምክር ስጧል</p> <p>Advise mother to give homecare</p>                                                                                      |

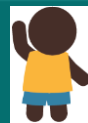

# STEP 6: Classify child 12-59 months based on SpO2, RR results, and danger signs

| የከባድ በሽታ ምልክቶች<br>Signs of illness 12 to 59 months                                                                                                                                                                                                                                                                                                                               | የትንፋሽ መጠን<br>RR                                                                                                                                                                                                               | የአክሲድን መጠን<br>SpO2                                                                   | ስያሜ<br>Classification                                                                                                    | ህክምና<br>Treatment                                                                                                                                                    |
|----------------------------------------------------------------------------------------------------------------------------------------------------------------------------------------------------------------------------------------------------------------------------------------------------------------------------------------------------------------------------------|-------------------------------------------------------------------------------------------------------------------------------------------------------------------------------------------------------------------------------|--------------------------------------------------------------------------------------|--------------------------------------------------------------------------------------------------------------------------|----------------------------------------------------------------------------------------------------------------------------------------------------------------------|
| <ul style="list-style-type: none"> <li>• ሳል ወይም የመተንፈስ ችግር ያለው እና</li> <li>• በተረጋጋ ልጅ ስትራይዲር ያለው ወይም</li> <li>• የአደገኛ በሽታ ምልክቶች ያለው ወይም</li> <li>• የደረት መሰርጎድ ያለው</li> </ul> <p>History of cough or difficulty breathing, AND</p> <ul style="list-style-type: none"> <li>• Stridor in calm child, OR</li> <li>• Any general danger sign OR</li> <li>• chest indrawing</li> </ul> | <p>ፈጣን አተነፋፈስ <math>\geq 40</math> ትንፋሽ (በደቂቃ) ወይም</p> <p>ፈጣን ያልሆነ አተነፋፈስ (<math>\leq 39</math> ትንፋሽ በደቂቃ)</p> <p>Fast breathing (<math>\geq 40</math> breaths) OR</p> <p>Normal breathing (<math>\leq 39</math> breaths)</p> | <p>የአክሲድን መጠን ዝቅተኛ አይደለም (<math>&gt;90\%</math>)</p> <p>SP <math>&gt;90\%</math></p> | <p>ከባድ የሳንባ ምች ወይም በጣም ከባድ በሽታ</p> <p>SEVERE PNEUMONIA or VERY SEVERE DISEASE</p>                                        | <p>የቅድመ ሪፈራል መድሀኒት መስጠትና በአፋጣኝ አክሲዲን ወዳለበት ሆስፒታል ሪፈር ማድረግ</p> <p>Give first dose of an appropriate antibiotic and REFER URGENTLY to hospital with oxygen therapy</p> |
| <ul style="list-style-type: none"> <li>• ሳል ወይም የመተንፈስ ችግር ያለው እና</li> <li>• ስትራይዲር ያለው ወይም</li> <li>• የአደገኛ በሽታ ምልክቶች የሌለው ወይም</li> <li>• የደረት መሰርጎድ የሌለው</li> </ul> <p>History of cough or difficulty breathing AND NO general danger signs, NO chest indrawing, NO stridor</p>                                                                                                | <p>ፈጣን አተነፋፈስ <math>\geq 40</math> ትንፋሽ (በደቂቃ)</p> <p>Fast breathing (<math>\geq 40</math> breaths)</p>                                                                                                                       | <p>ዝቅተኛ የአክሲድን መጠን (<math>\leq 90\%</math>)</p> <p>SP <math>\leq 90\%</math></p>     | <p>ከባድ የሳንባ ምች ወይም በጣም ከባድ በሽታ እና ዝቅተኛ የአክሲድን መጠን</p> <p>SEVERE PNEUMONIA or VERY SEVERE DISEASE with HYPOXIA</p>        |                                                                                                                                                                      |
| <ul style="list-style-type: none"> <li>• ሳል ወይም የመተንፈስ ችግር ያለው እና</li> <li>• ስትራይዲር ያለው ወይም</li> <li>• የአደገኛ በሽታ ምልክቶች የሌለው ወይም</li> <li>• የደረት መሰርጎድ የሌለው</li> </ul> <p>History of cough or difficulty breathing AND NO general danger signs, NO chest indrawing, NO stridor</p>                                                                                                | <p>ፈጣን ያልሆነ አተነፋፈስ (<math>\leq 39</math> ትንፋሽ በደቂቃ)</p> <p>Normal breathing (<math>\leq 39</math> breaths)</p>                                                                                                                | <p>ዝቅተኛ የአክሲድን መጠን (<math>\leq 90\%</math>)</p> <p>SP <math>\leq 90\%</math></p>     | <p>ዝቅተኛ የአክሲድን መጠን (የሳንባ ምች ወይም በጣም ከባድ በሽታ የሌለው)</p> <p>HYPOXIA</p> <p>No signs of severe disease or fast breathing</p> | <p>በአፋጣኝ አክሲዲን ወዳለበት ሆስፒታል ሪፈር ማድረግ</p> <p>REFER URGENTLY to hospital with oxygen therapy</p>                                                                        |
| <ul style="list-style-type: none"> <li>• ሳል ወይም የመተንፈስ ችግር ያለው እና</li> <li>• ስትራይዲር ያለው ወይም</li> <li>• የአደገኛ በሽታ ምልክቶች የሌለው ወይም</li> <li>• የደረት መሰርጎድ የሌለው</li> </ul> <p>History of cough or difficulty breathing AND NO general danger signs, NO chest indrawing, NO stridor</p>                                                                                                | <p>ፈጣን አተነፋፈስ <math>\geq 40</math> ትንፋሽ (በደቂቃ)</p> <p>Fast breathing (<math>\geq 40</math> breaths)</p>                                                                                                                       | <p>የአክሲድን መጠን ዝቅተኛ አይደለም (<math>&gt;90\%</math>)</p> <p>SP <math>&gt;90\%</math></p> | <p>የሳንባ ምች</p> <p>PNEUMONIA</p>                                                                                          | <p>በአምክሳስሊን ቶሪቲ በ ቀን 2 ጊዜ ለ5 ቀን ህክምና ስጧል</p> <p>Treat with oral amoxicillin 2 times a day for 5 days</p>                                                             |
| <ul style="list-style-type: none"> <li>• ሳል ወይም የመተንፈስ ችግር ያለው እና</li> <li>• ስትራይዲር ያለው ወይም</li> <li>• የአደገኛ በሽታ ምልክቶች የሌለው ወይም</li> <li>• የደረት መሰርጎድ የሌለው</li> </ul> <p>History of cough, NO general danger signs, NO chest indrawing, NO stridor</p>                                                                                                                           | <p>ፈጣን ያልሆነ አተነፋፈስ (<math>\leq 39</math> ትንፋሽ በደቂቃ)</p> <p>Normal breathing (<math>\leq 39</math> breaths)</p>                                                                                                                | <p>የአክሲድን መጠን ዝቅተኛ አይደለም (<math>&gt;90\%</math>)</p> <p>SP <math>&gt;90\%</math></p> | <p>ሳል ወይም ጉንፋን</p> <p>COUGH or COLD</p>                                                                                  | <p>በአምክሳስሊን በ ቀን 2 ጊዜ ለ5 ቀን ህክምና ስጧል</p> <p>Advise mother to give homecare</p>                                                                                       |

# ጥቅም ላይ የዋለውን መሳሪያ መመዝገብ

## STEP 7: Record which device used

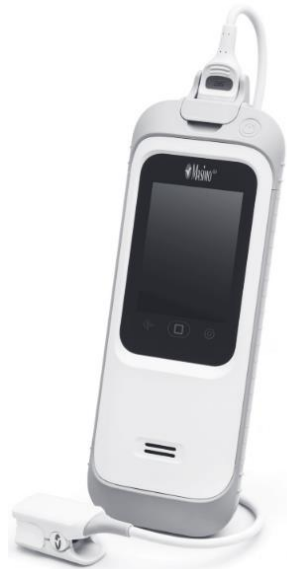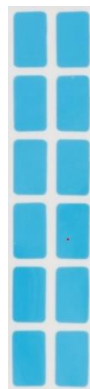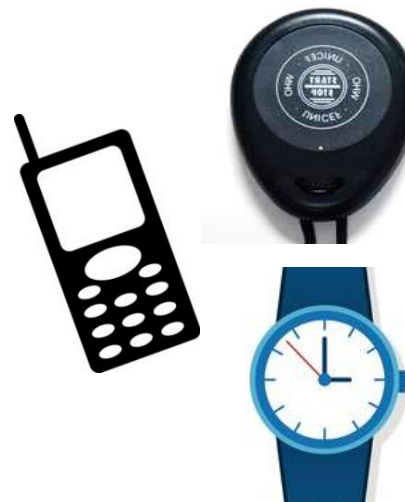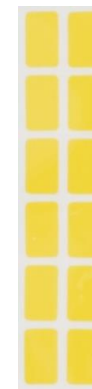

የራድ ጂ መሳሪያን ከተጠቀምሽ ስማያዊ ስቲከር በመዝገብሽ ላይ ለጥፊ

Stick a blue sticker in your logbook if you used the Rad-G device

ከራድ ጂ መሳሪያ ውጪ ከተጠቀምሽ ቢጫ ስቲከር በመዝገብሽ ላይ ለጥፊ

Stick a yellow sticker in your logbook if you used your usual device (ARI timer, phone, or watch)

# ህፃኑ ሪፈረ ካልተደረገ ቀሪ ምርመራዎችን አጠናቂ

If child was not referred, complete remainder of child assessment

ከ1-7 ድረስ ያሉ ተግባራትን ካጠናቀቅሽ በሃላ ምርመራሽን በአይ.ሲ.ሲ.ኤም መሰረት ቀጥይ

Once you have completed STEPS 1-6, please continue child assessment as usual

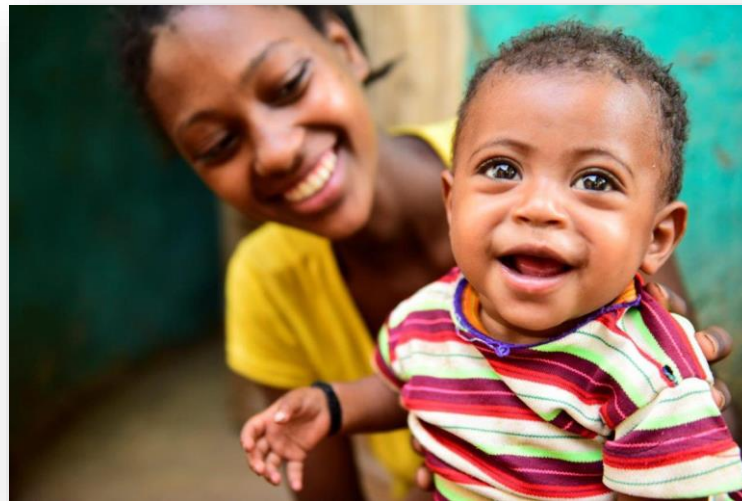



# ከ0-2 ወራት ያላቸውን ጨቅላዎች ለበጣም ከባድ በሽታ በአይሲሲኤም መመሪያ መሰረት ማከም

**STEP 8:** Treat children 0 to 2 months with very severe disease according to national guidelines

ዕድሜ  
ከ 0 – 2 ወራት

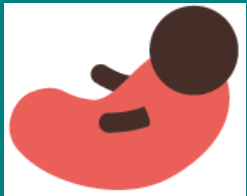

0 to <2 months

## አምክሳሰሊን Amoxicillin

- በጣም ከባድ በሽታ ላለው ጨቅላዎች የሚሰጥ ህክምና ... በቀን ሁለት ጊዜ ለ7 ቀናት ስጪ  
For very severe disease, give 2 times/day for 7 days
- ለዉስን የባክተሪያል እንፌክሽን የሚሰጥ ህክምና ... በቀን ሁለት ጊዜ በየቀኑ ለ 5 ቀናት ስጪ  
For local bacterial infection give 2 times/day for 5 days
- ለቅድመ ሪፈራል ... ከሪፈራል በፊት አንድ ዶዝ ስጪ  
For pre-referral treatment give 1<sup>st</sup> dose

| ክብደት<br>Weight                           | በቅፅበት ማ*ሚ ኪኒን ባለ 125 ሚሊ ግራም ይሰጣል<br>Dispersed tablet 125mg | በቅፅበት ማ*ሚ ኪኒን ባለ 250 ሚሊ ግራም ይሰጣል<br>Dispersed tablet 250mg | ባለ 125 ሚሊ ግራም ሽሮፕ በ 5ሚሊ መጠን ይሰጣል<br>Syrup 125mg / 5ml |
|------------------------------------------|------------------------------------------------------------|------------------------------------------------------------|-------------------------------------------------------|
| ከ 2000 ግራም በታች<br>< 2,000g               | ግማሽ እንክብል<br>½ tablet                                      | ሩብ እንክብል<br>¼ tablet                                       | 2.5 ሚሊ ሊትር<br>2.5ml                                   |
| ከ2000 እስከ 4500 ግራም<br>2,000g to < 4,500g | አንድ ሙሉ እንክብል<br>1 tablet                                   | ግማሽ እንክብል<br>½ tablet                                      | 5 ሚሊ ሊትር<br>5ml                                       |

# ከ0-2 ወራት ያላቸውን ጨቅላዎች ለበጣም ከባድ በሽታ በአይሲሲኤም መመሪያ መሰረት ማከም

**STEP 8:** Treat children 0 to 2 months with very severe disease according to national guidelines

ዕድሜ

ከ 0 – 2 ወራት

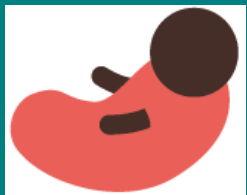

0 to <2 months

## ጀንታማይሲን IM Gentamicin:

- በጣም ከባድ በሽታ ላለው ጨቅላ የሚሰጥ ህክምና ... በቀን አንድ ጊዜ ለ7 ቀናት ስጪ  
For very severe disease once /day for 7 days
- በጣም ከባድ በሽታ ላለው ጨቅላ የሚሰጥ ህክምና ከብደታቸው ከ2000 ግራም በታች በየ48ሰዓቱ አንዴ ለ4ቀናት ስጪ ::  
For very severe disease for less than 2,000g every 48 hours once for 4 days
- ለቅድመ ሪፈራል ... ከሪፈራል በፊት አንድ ዶዝ ስጪ  
For pre-referral treatment give 1<sup>st</sup> dose

| ክብደት<br>Weight                           | ጀንታማይሲን 20ሚ.ግ/2ሲ.ሲ.<br>Gentamicin 20mg /2cc | ጀንታማይሲን 80ሚ.ግ/2ሲ.ሲ.<br>Gentamicin 80mg/ 2cc |
|------------------------------------------|---------------------------------------------|---------------------------------------------|
| ከ 2000 ግራም በታች<br>< 2,000g               | 1ሲ.ሲ. በየ48 ሰዓት /<br>1 cc every 48 hours     | 0.3 ሲ.ሲ. በየ48 ሰዓት<br>0.3 cc every 48 hours  |
| ከ2000 እስከ 2500 ግራም<br>2,000g to < 2,500g | 1 ሲ.ሲ. በቀን /<br>1cc daily                   | 0.3 ሲ.ሲ. በቀን /<br>0.3 cc daily              |
| 2500 እስከ 3500 ግራም<br>2,500 to < 3,500 g  | 1.4 ሲ.ሲ. በቀን /<br>1.4 cc daily              | 0.4 ሲ.ሲ. በቀን /<br>0.4 cc daily              |
| 3500 እስከ 4500 ግራም<br>3,500 to < 4,500g   | 2ሲ.ሲ.በቀን /<br>2cc daily                     | 0.5 ሲ.ሲ. በቀን /<br>0.5 cc daily              |

# ከ2-59 ወራት ያላቸውን ህፃናት ለሳንባ ምች በአይሲሲኤም መመሪያ መሰረት ማከም

## STEP 8: Treat children 2 to 59 months with pneumonia according to national guidelines

### ዕድሜ ከ 2 – 59 ወራት

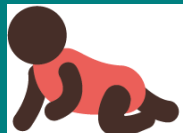

For 2-59 months

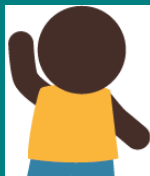

አምክሳሲን በቀን 2 ጊዜ ለ 5 ቀን ሰጪ  
Oral amoxicillin 2 times a day for 5 days

2 to <12 months

12 to 59 months

ዕድሜ እና ክብደት  
Age and weight

ባለ 125 ሚሊ ግራም  
ይሰጣል  
Dispersed 125mg

ባለ 250 ሚሊ ግራም  
ይሰጣል  
Dispersed 250mg

ባለ 125 ሚሊ ግራም  
ሽሮፕ በ 5ሚሊ  
መጠን ይሰጣል  
Syrup 125mg / 5ml

ከ2 እስከ 12 ወራት (ከ4 እስከ 10 ኪሎ ግራም  
ባላቸው)  
2 to < 12 months (4 to < 10kg)

2 እንክብል  
2 tablets

1 እንክብል  
1 tablets

5 ሚሊ  
5ml

ከ12 እስከ 3 ዓመት (ከ10 እስከ 14 ኪሎ  
ግራም ባላቸው)  
12 months to <3 years (10 to < 14kg)

4 እንክብል  
4 tablets

2 እንክብል  
2 tablets

10 ሚሊ  
10 ml

ከ 3 ዓመት እስከ 5 ዓመት / 14 – 19 ኪ.ግ/  
3 years to < 5 years (14 to < 19kg)

6 እንክብል  
6 tablets

3 እንክብል  
3 tablets

15 ሚሊ  
15ml

# ስለሳንባ ምች መከላከያ መንገድ ማስተማር

## STEP 9: Give pneumonia prevention messages

ለመጀመሪያዎቹ 6 ወራት ህፃኑን የእናት ጡት ወተት ብቻ ይመግቡ

Feed your child only breast milk for the first 6 months of life

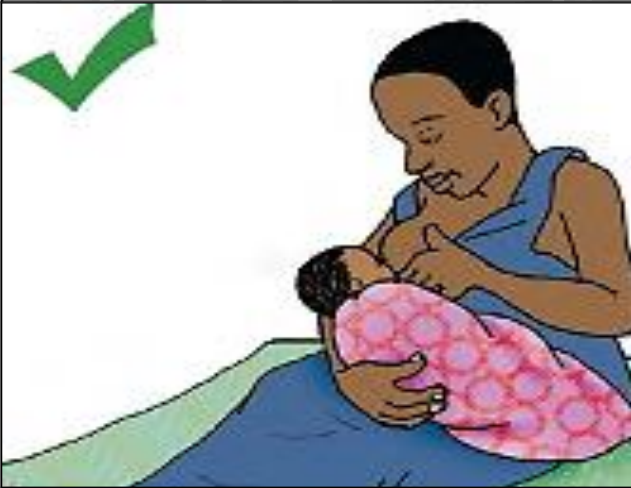

ህፃናትን እስከ 2 ዓመትና ከዚያም በላይ የእናት ጡት ወተት እንዲጠቡ አድርጉ

Breast feed children for 2 years or more

ልጆችን በግዜ አስከትቡ

Take children for immunizations

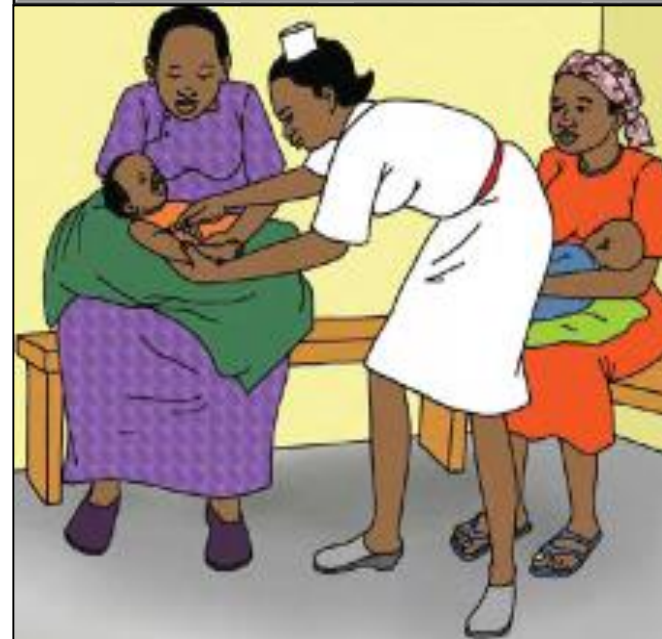

# ስለሳንባ ምች መከላከያ መንገድ ማስተማር

## STEP 9: Give pneumonia prevention messages

ልጆች የተመጣጠነና በቂ ምግብ  
እንዲመገቡ ያድርጉ

Give children enough and different nutritious foods to eat

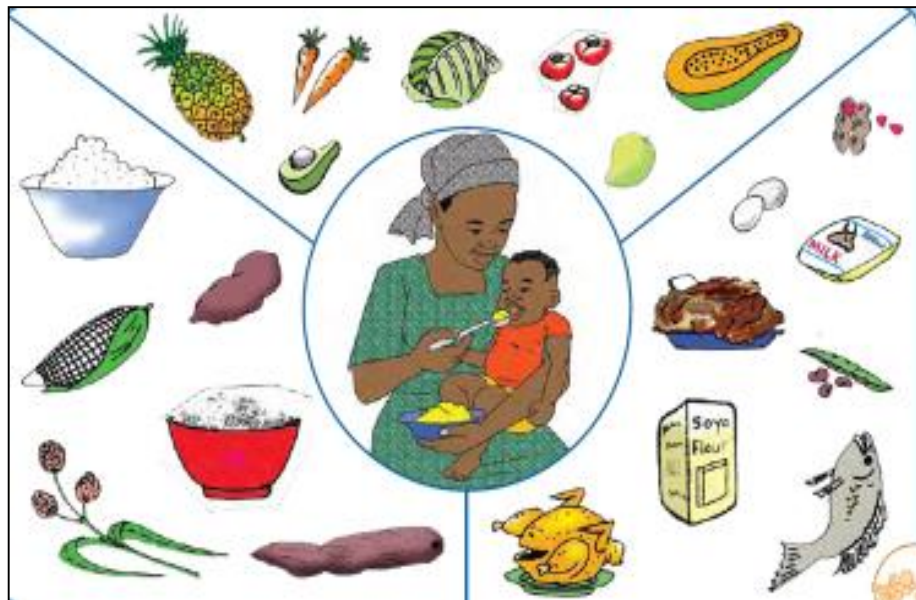

ህፃናትና ልጆች ለቤት ውስጥ የአየር  
ብክለት እንዳይጋለጡ ያድርጉ

Keep babies and children away from smoky rooms  
Cook in a well ventilated area.

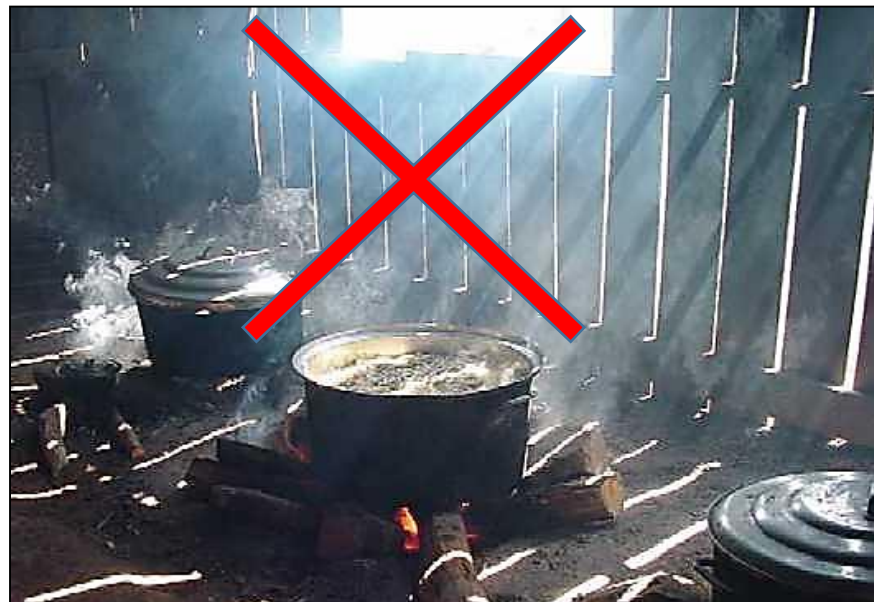

# አስፈላጊ አድራሻዎች - CONTACT CARD

የአጣዳፊ የመተንፈሻ አካላት በሽታ ምርመራ አጋዥ መሣርያ ጥናት ዓላማ የጤና ኤክስቴንሽን ሰራተኞች እና የጤና ባለሙያዎች ከ5 ዓመት በታች ያሉ ሕፃናትን ላይ አተነፋፈስ መቁጠሪያ አጋዥ መሣርያ አጠቃቀምን ለመመዘን ነው።

*The Acute Respiratory Infection Diagnostic Aids (ARIDA) project aims to evaluate community health workers' and facility health workers' use of respiratory rate counting aids on children under five in Ethiopia.*

ከጥናቱ ጋር በተያያዘ ምንም ዓይነት ችግር ቢያጋጥምዎት ለሚከተሉት ባልደረቦቻችን በአድራሻቸው ያሳውቁ :

Should you experience any issue related to the study, please contact the following people to report it:

- በመሳሪያው ላይ ለሚታዩ ችግሮች: ለ እስክንድር ጎሹ, የመስክ አስተባባሪ, [e.goshu@malariaconsortium.org](mailto:e.goshu@malariaconsortium.org) +2510911825630  
**Device fault:** Eskinder Goshu, MC Site Coordinator, [e.goshu@malariaconsortium.org](mailto:e.goshu@malariaconsortium.org), +2510911825630
- ከመሳሪያው ጋር ተጓዳኝነት ያለቸው ከባድ የህመም ክስተቶች: ለ ተድላ ሃብቴ, የፕሮጀክቱ ሥራአስኪያጅ +251 931404500  
[t.habte@malariaconsortium.org](mailto:t.habte@malariaconsortium.org)  
**Severe adverse event:** Tedila Habte, MC Project Manager, [t.habte@malariaconsortium.org](mailto:t.habte@malariaconsortium.org), +251 931404500
- ለመረጃ አሰባሰብን በተመለከተ: ለየኔዓለም ረታ, ዳታ ማናጀር [miyeyeni@gmail.com](mailto:miyeyeni@gmail.com), +251911973794  
**Data enquiry:** Yene Rata, MC Data Manager, [miyeyeni@gmail.com](mailto:miyeyeni@gmail.com), +251911973794
- በአጠቃላይ ጥናቱን በተመለከተ ለሚኖሩ ጥያቄዎች: ለ እስክንድር ጎሹ, የመስክ አስተባባሪ, [e.goshu@malariaconsortium.org](mailto:e.goshu@malariaconsortium.org) +2510911825630  
**General study enquiry:** Eskinder Goshu, MC Technical Officer, [e.goshu@malariaconsortium.org](mailto:e.goshu@malariaconsortium.org), +2510911825630
- ለማናቸውም አግባብነት የሌላቸው አሰራር ስህተቶችን በተመለከተ : ለ ዶ/ር አጎናፍር ተካልኝ, ካንትሪ ዳይሬክተር [a.tekalegne@malariaconsortium.org](mailto:a.tekalegne@malariaconsortium.org) +251 (0)118963443፣ ኬቭን ቤከር, ፕሮግራም አስተባባሪ [k.baker@malariaconsortium.org](mailto:k.baker@malariaconsortium.org) +44 (0)20 7549 0270  
**Abuse:** Agonafer Tekalegne, MC Country Director, [a.tekalegne@malariaconsortium.org](mailto:a.tekalegne@malariaconsortium.org), +251 (0)118963443  
Kevin Baker, MC Programme Coordinator, [k.baker@malariaconsortium.org](mailto:k.baker@malariaconsortium.org), +44 (0)20 7549 0270

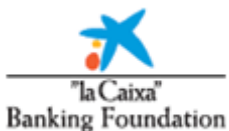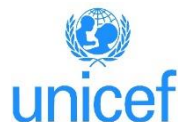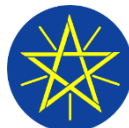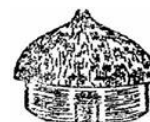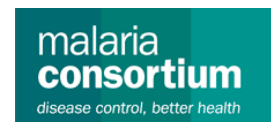

Supplement: resprot_v9i3e14405_app1.pdf [file resprot_v9i3e14405_app1.pdf]
